# Supplementary material for: Functional classification of memory CD8+ T cells by CX3CR1 expression
Source: PubMed Central journal article supplement (PMC4667439; doi:10.1038/ncomms9306), 2015-09-25
Supplement: ncomms9306-s1.pdf [file ncomms9306-s1.pdf]

# Supplementary Figure 1

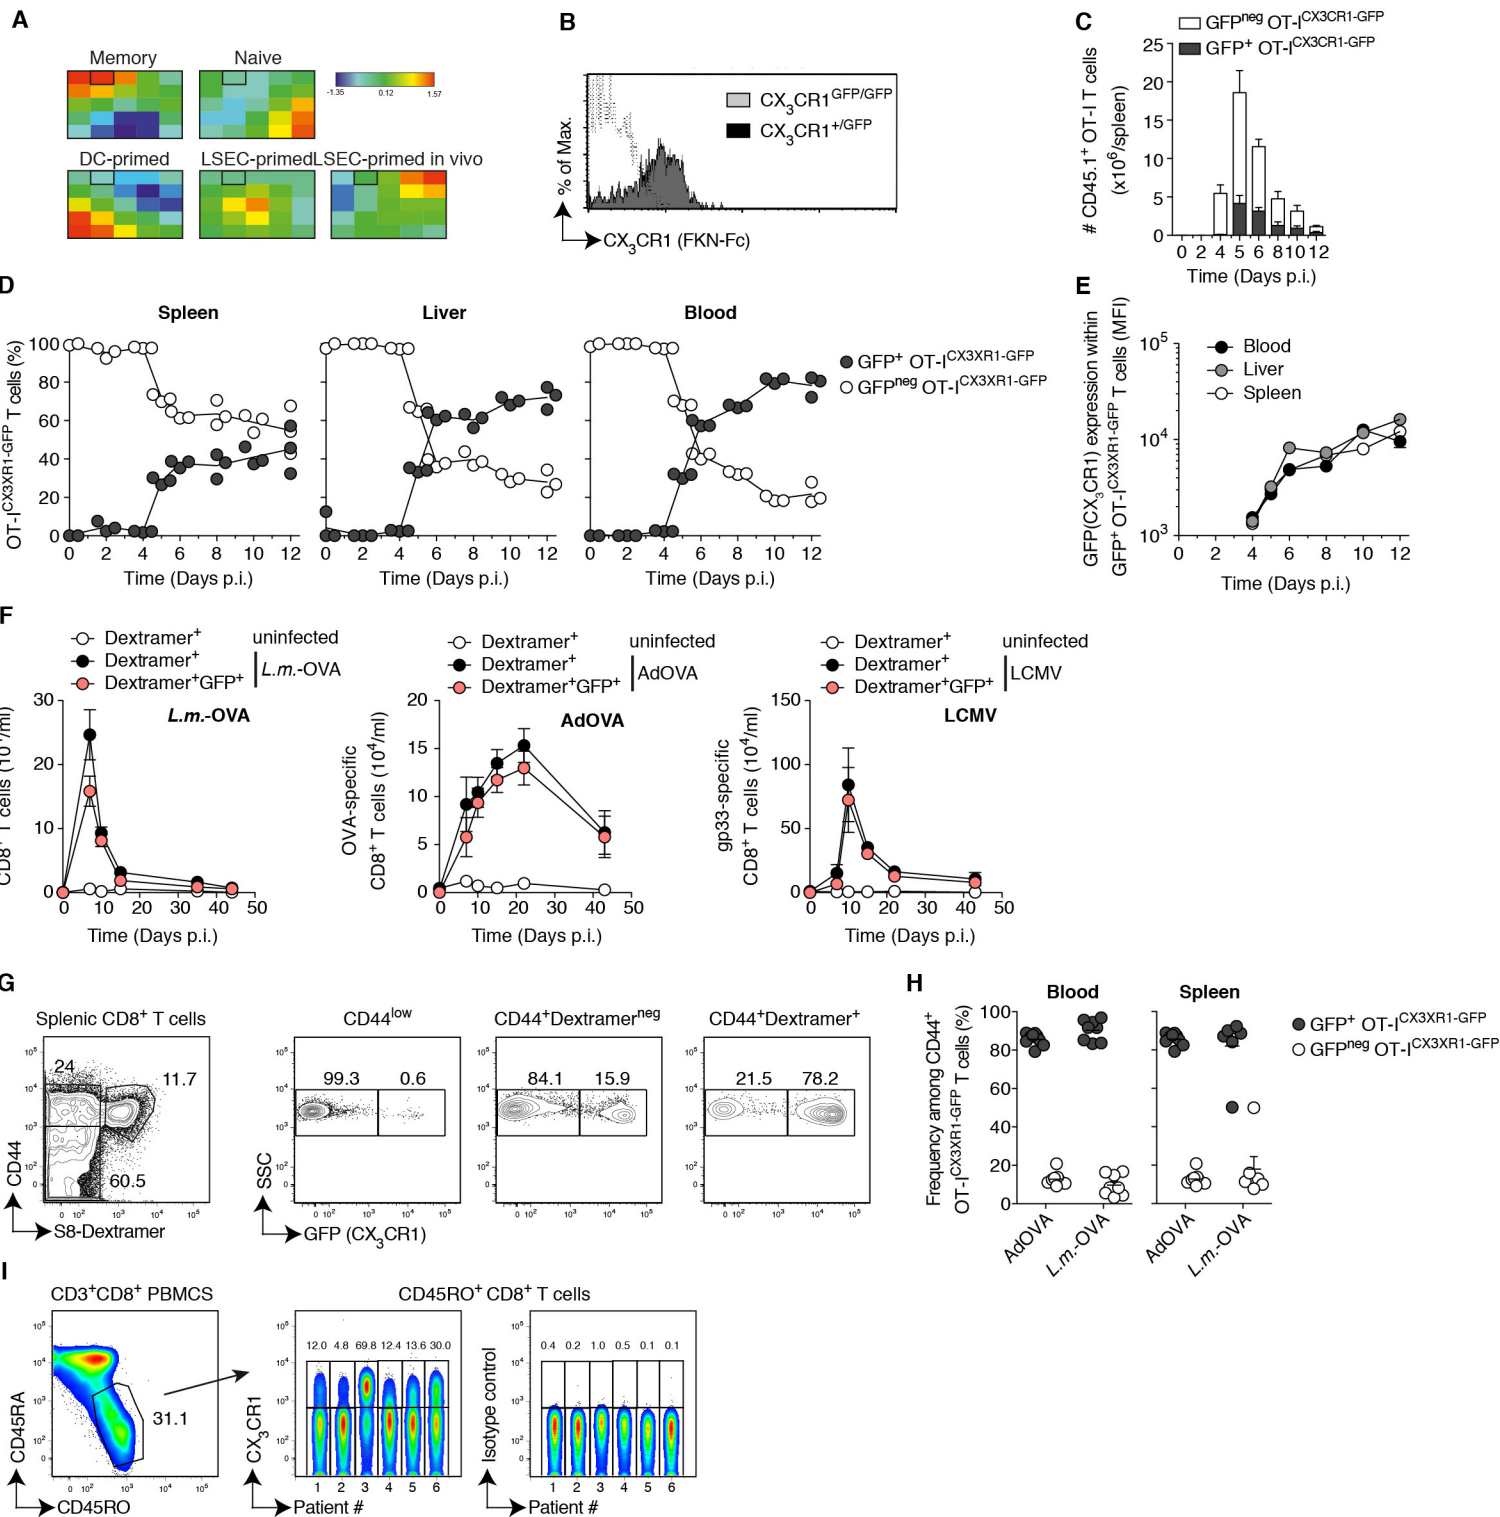

## Supplementary Figure 1 CX<sub>3</sub>CR1 expression on CD8<sup>+</sup> T cells in man and mouse

**(A)** Self-Organizing Map (SOM) clustering based on present genes obtained from gene expression data from memory, naive as well as LSEC-, DC-, and *in vivo* LSEC-primed CD8<sup>+</sup> T cells (1) was used to identify genes specific for memory CD8<sup>+</sup> T cells. The gene cluster containing CX<sub>3</sub>CR1 is marked with a frame. **(B)** GFP<sup>+</sup>CD8<sup>+</sup> T cells from CX<sub>3</sub>CR1 reporter mice were analyzed for CX<sub>3</sub>CR1 protein expression using CX<sub>3</sub>CL1-Fc detected with a secondary antibody. **(C-E)** C57BL/6 mice, that had received 3x10<sup>5</sup> naive CD44<sup>low</sup>CD45.1<sup>+</sup> OT-I-CX<sub>3</sub>CR1-GFP, were infected with AdOVALUC (see Fig. 1 H, I). Time kinetics for **(C)** total numbers of GFP<sup>+</sup> and GFP<sup>neg</sup> CD45.1<sup>+</sup> OT-I-CX<sub>3</sub>CR1-GFP T cells in spleen, **(D)** frequencies of GFP<sup>+</sup> and GFP<sup>neg</sup> T cells among CD45.1<sup>+</sup> OT-I-CX<sub>3</sub>CR1-GFP cells in spleen, liver and blood and **(E)** Mean fluorescence intensity (MFI) of the GFP signal in GFP<sup>+</sup> CD45.1<sup>+</sup> OT-I-CX<sub>3</sub>CR1-GFP T cells. **(F)** Time kinetics after infection of CX<sub>3</sub>CR1<sup>+/GFP</sup> mice with AdOVA, *L.m.*-OVA or LCMV (WE strain) for numbers of total and OVA-specific GFP<sup>+</sup>CD44<sup>+</sup> CD8<sup>+</sup> T cells (after AdOVA and *L.m.*-OVA infection) or LCMV gp33-specific CD44<sup>+</sup> CD8<sup>+</sup> T cells isolated from blood. OVA-specific or gp33-specific T cells were identified by Dextramer-staining. Uninfected CX<sub>3</sub>CR1<sup>+/GFP</sup> mice served as control. **(G)** Flow cytometric analysis of CX<sub>3</sub>CR1 expression in splenic OVA-specific CD44<sup>+</sup>CD8<sup>+</sup> T cells from CX<sub>3</sub>CR1<sup>+/GFP</sup> mice at d60 after AdOVA infection. OVA-specific T cells were identified by staining with H2-K<sup>b</sup>:SINFEKEL Dextramers (S8-Dextramer). **(H)** C57BL/6 mice were infected with AdOVA or *L.m.*-OVA after adoptive transfer of 500 FACSorted naive CD44<sup>low</sup>CD8<sup>+</sup> OT-I-CX<sub>3</sub>CR1-GFP T cells into CD45.2<sup>+</sup> mice. After >45 days, determination of the frequencies of GFP<sup>+</sup> and GFP<sup>neg</sup> cells among CD45.1<sup>+</sup> OT-I-CX<sub>3</sub>CR1-GFP cells in blood and spleen. **(I)** Flow cytometric analysis of CX<sub>3</sub>CR1 expression in CD3<sup>+</sup>CD45RO<sup>+</sup>CD8<sup>+</sup> PBMCs from blood of 6 healthy humans.

## Supplementary Figure 2

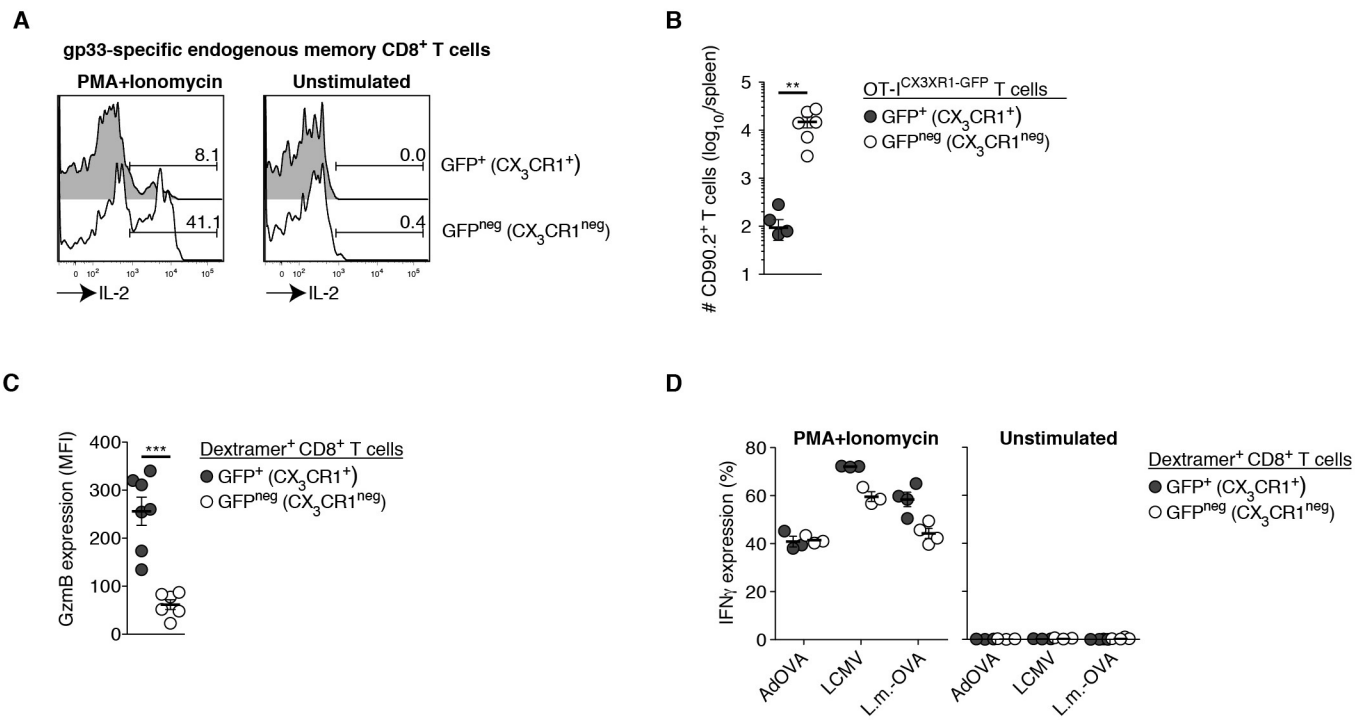

**Supplementary Figure 2** *CX<sub>3</sub>CR1* expression separates CD8<sup>+</sup> T cells with effector function from T cells with proliferative capacity

**(A)** Representative analysis of intracellular IL-2 expression in GFP<sup>+</sup> and GFP<sup>neg</sup> gp33-specific memory T cells isolated from spleen of *CX<sub>3</sub>CR1<sup>+</sup>/GFP* mice that were infected with LCMV 60 days before. **(B)**  $5 \times 10^2$  GFP<sup>+</sup> or GFP<sup>neg</sup> memory OT-*I<sub>CX3CR1</sub>-GFP* T cells (CD90.2<sup>+</sup>) were adoptively transferred into CD90.1 mice followed by infection with AdOVA. Determination of numbers of CD90.2<sup>+</sup> T cells at d8 p.i. in the spleen. \*\* $p < 0.01$ , t-test. **(C)** Quantification of GzmB expression in (*CX<sub>3</sub>CR1<sup>+</sup>*) and GFP<sup>neg</sup> (*CX<sub>3</sub>CR1<sup>neg</sup>*) OVA-specific memory T cells from spleen of *CX<sub>3</sub>CR1<sup>+</sup>/GFP* mice that were infected with *L.m.-OVA* >45 days before. \*\*\* $p < 0.001$ , t-test. **(D)** *CX<sub>3</sub>CR1<sup>+</sup>/GFP* mice were infected with AdOVA, *L.m.-OVA* or LCMV (WE strain). 45-60 days later, IFN $\gamma$  production by GFP<sup>+</sup> (*CX<sub>3</sub>CR1<sup>+</sup>*) and GFP<sup>neg</sup> (*CX<sub>3</sub>CR1<sup>neg</sup>*) memory CD8<sup>+</sup> T cells specific for OVA (after AdOVA and *L.m.-OVA* infection) or LCMV gp33 was determined after PMA/Ionomycin stimulation *ex vivo*.

# Supplementary Figure 3

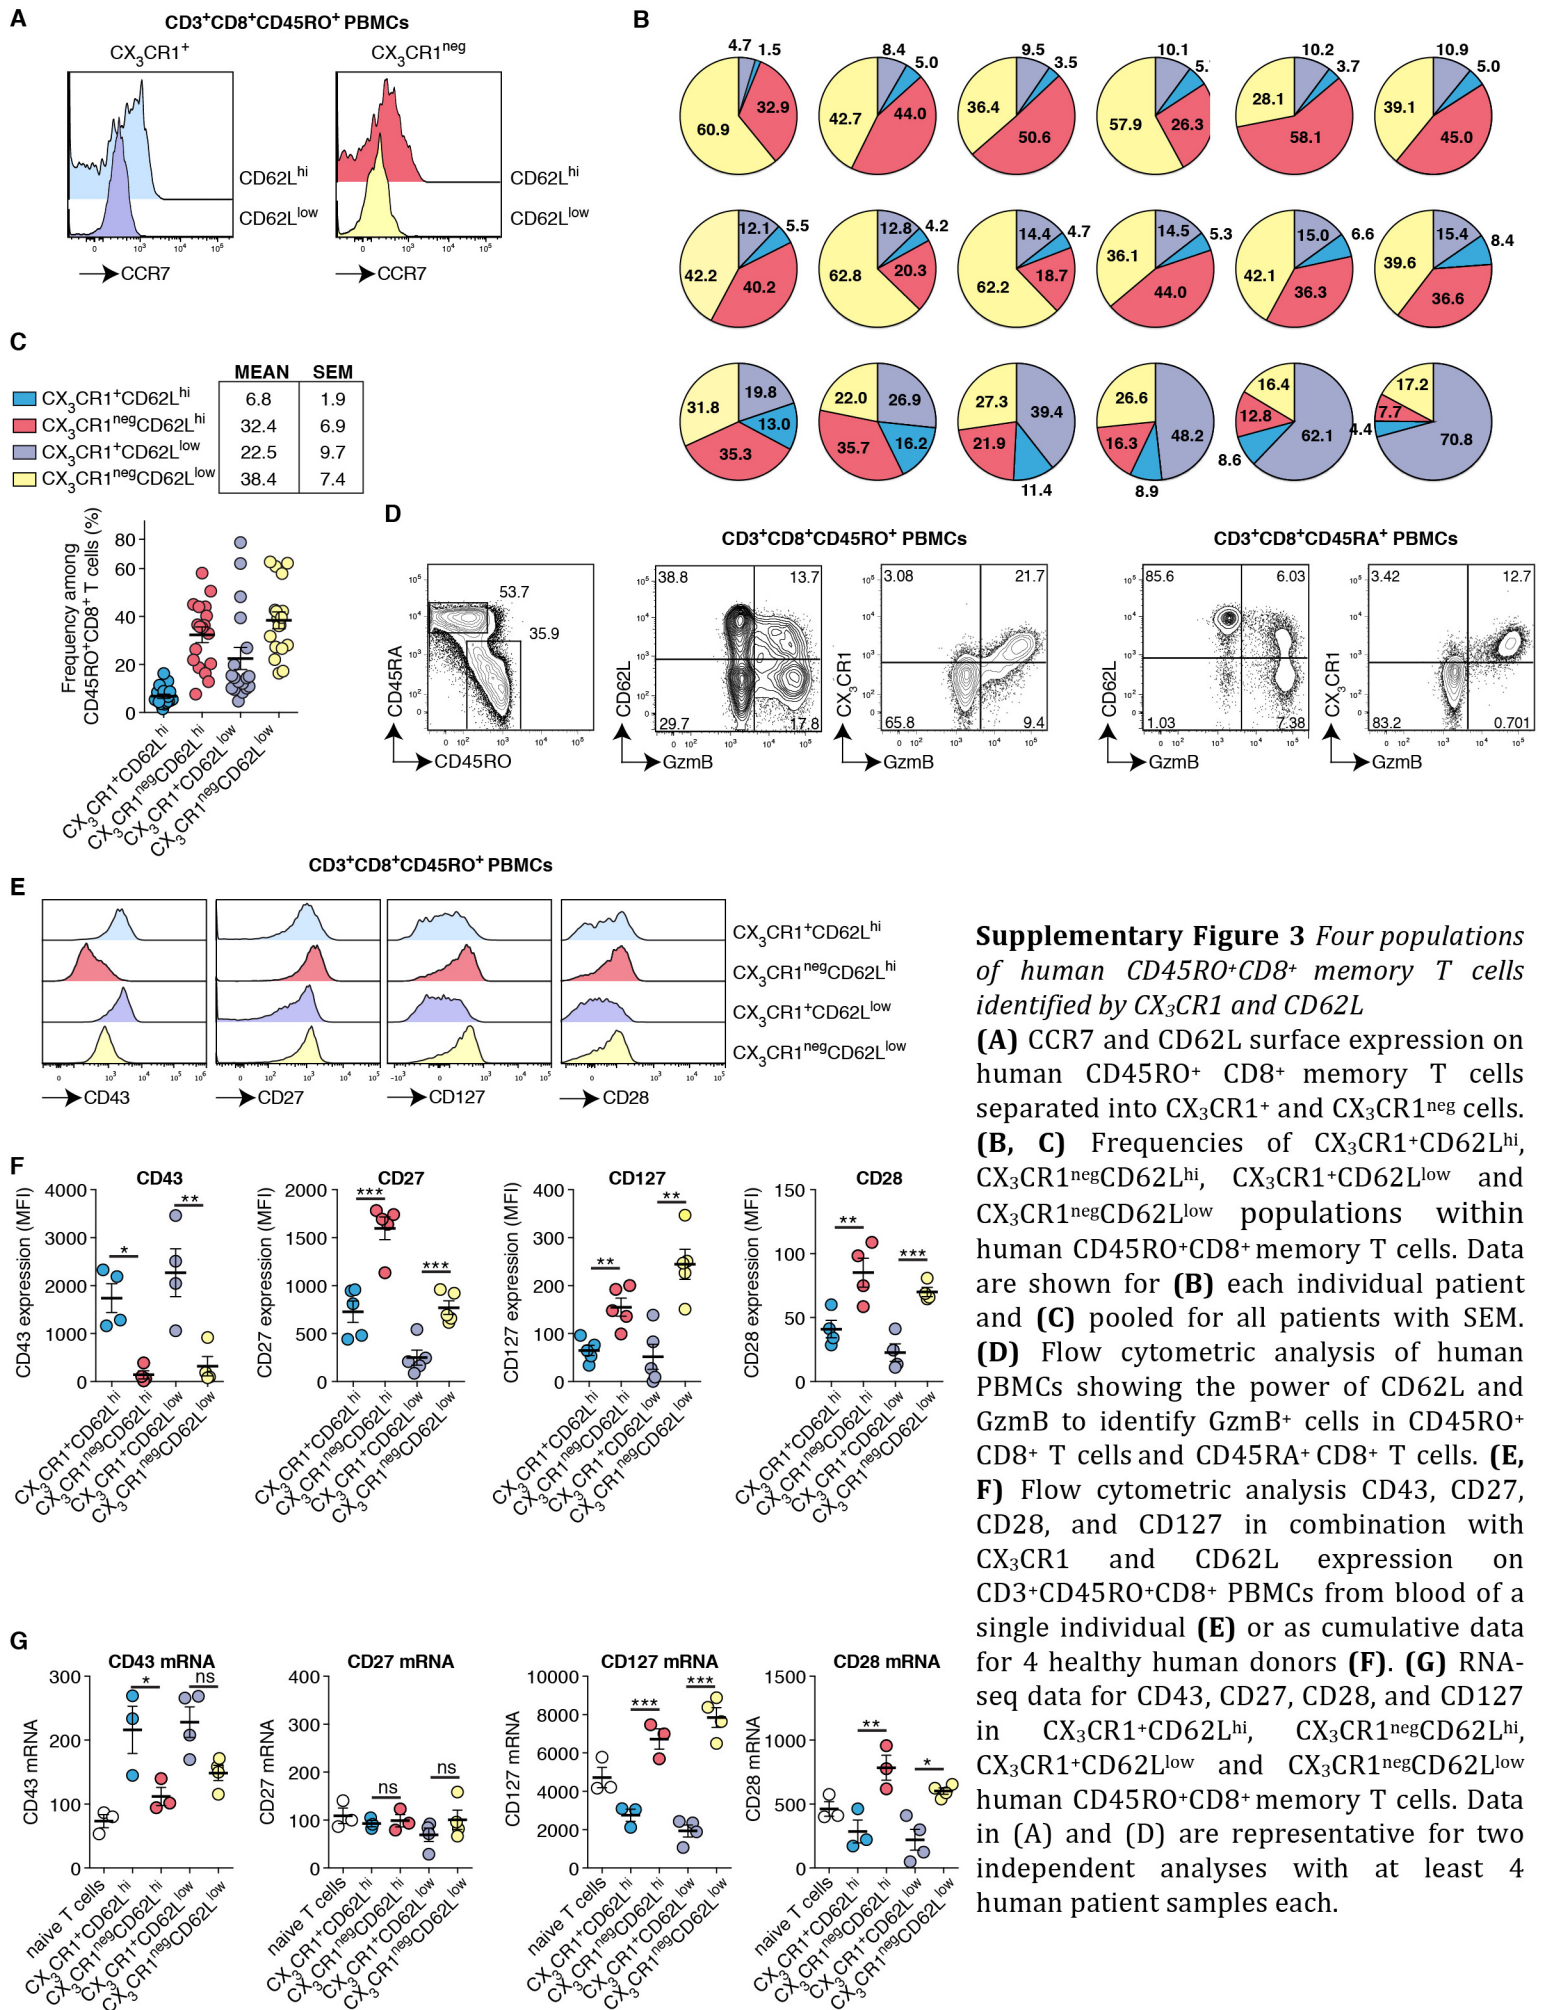

**Supplementary Figure 3** Four populations of human  $CD45RO^+CD8^+$  memory T cells identified by  $CX_3CR1$  and  $CD62L$

**(A)** CCR7 and  $CD62L$  surface expression on human  $CD45RO^+CD8^+$  memory T cells separated into  $CX_3CR1^+$  and  $CX_3CR1^{neg}$  cells.

**(B, C)** Frequencies of  $CX_3CR1^+CD62L^{hi}$ ,  $CX_3CR1^{neg}CD62L^{hi}$ ,  $CX_3CR1^+CD62L^{low}$  and  $CX_3CR1^{neg}CD62L^{low}$  populations within human  $CD45RO^+CD8^+$  memory T cells. Data are shown for **(B)** each individual patient and **(C)** pooled for all patients with SEM.

**(D)** Flow cytometric analysis of human PBMCs showing the power of  $CD62L$  and  $Gzmb$  to identify  $Gzmb^+$  cells in  $CD45RO^+CD8^+$  T cells and  $CD45RA^+CD8^+$  T cells. **(E, F)** Flow cytometric analysis  $CD43$ ,  $CD27$ ,  $CD28$ , and  $CD127$  in combination with  $CX_3CR1$  and  $CD62L$  expression on  $CD3^+CD45RO^+CD8^+$  PBMCs from blood of a single individual **(E)** or as cumulative data for 4 healthy human donors **(F)**.

**(G)** RNA-seq data for  $CD43$ ,  $CD27$ ,  $CD28$ , and  $CD127$  in  $CX_3CR1^+CD62L^{hi}$ ,  $CX_3CR1^{neg}CD62L^{hi}$ ,  $CX_3CR1^+CD62L^{low}$  and  $CX_3CR1^{neg}CD62L^{low}$  human  $CD45RO^+CD8^+$  memory T cells. Data in **(A)** and **(D)** are representative for two independent analyses with at least 4 human patient samples each.

## Supplementary Figure 4

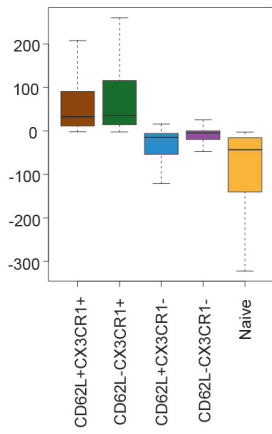

### **Supplementary Figure 4** *Identification of a core signature for human cytotoxic T cells*

Boxplots representing the distribution of correlation values for each CD8<sup>+</sup> T cell subpopulation of the Biolayout cluster used in combination with the ANOVA model to identify the core signature of CX3CR1<sup>+</sup> CD8<sup>+</sup> T cells.

Supplementary Figure 5

**A**

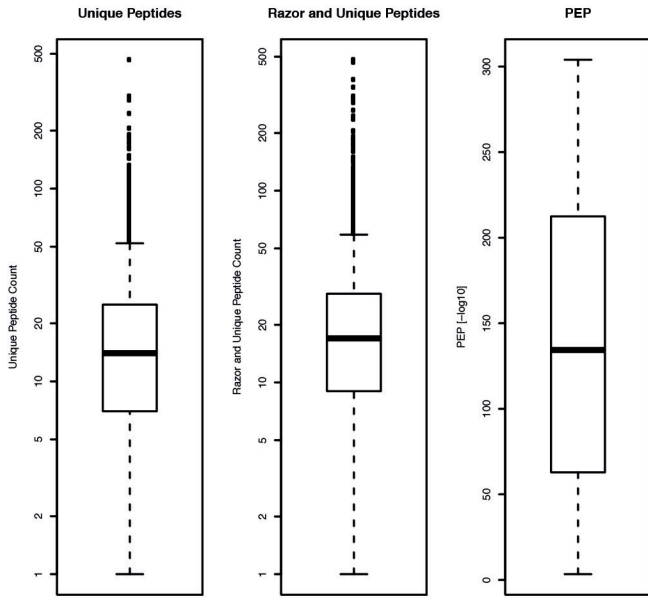

**B**

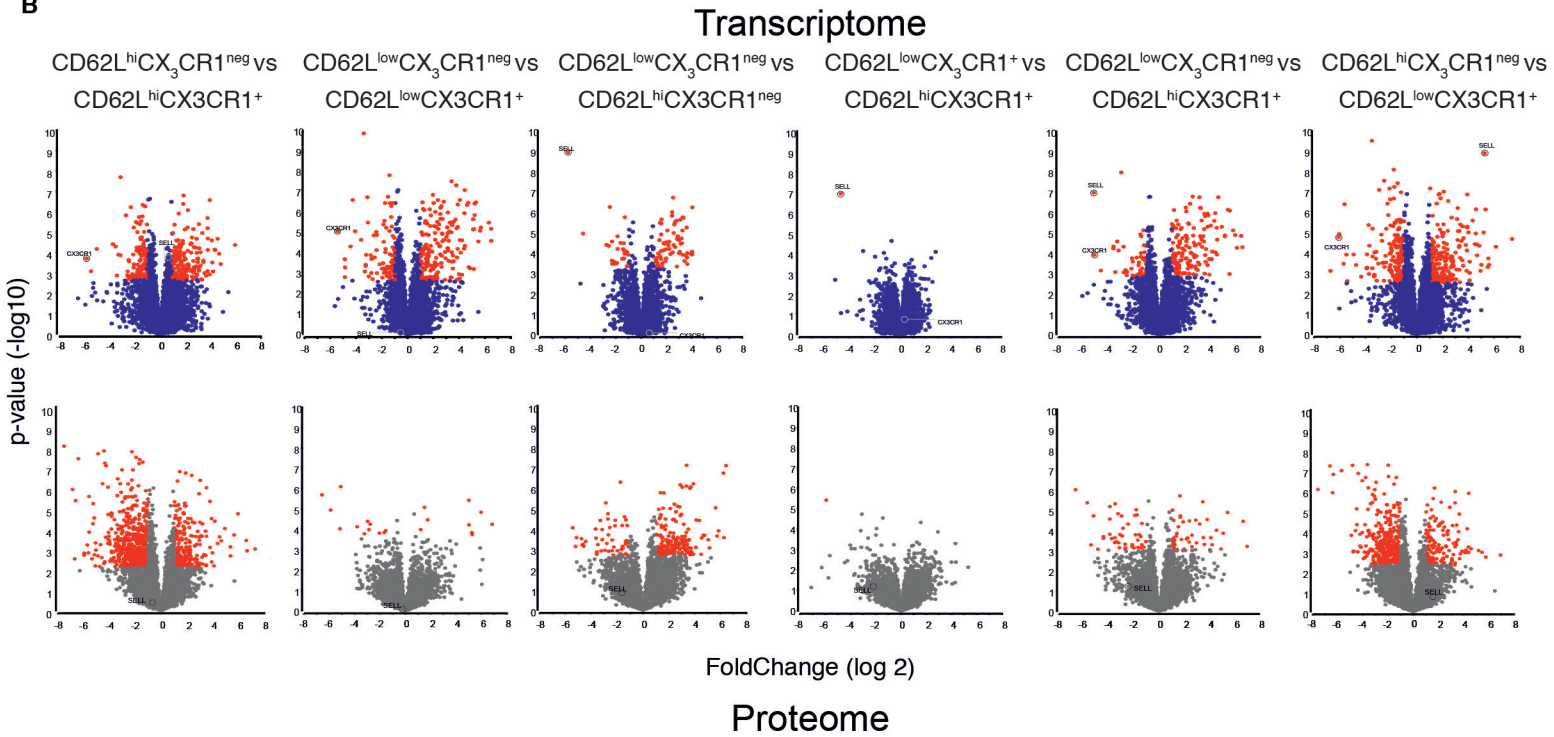

**Supplementary Figure 5** Proteomics identification measures and volcano plot analysis of differences in transcriptome and proteome between memory CD8<sup>+</sup> T cell populations

**(A)** Quality measures of protein group identifications. Numbers of unique peptides per identified protein group, numbers of razor and unique peptides per identified protein group and protein posterior error probability (PEP) for each protein group are shown. Boxplots show median with 5%–95% percentile. All numbers derive from the complete proteome data set including the peptide library. **(B)** Volcano plots displaying log<sub>2</sub>-fold-change against -log<sub>10</sub>-p-value of the comparisons of the different CD8<sup>+</sup> memory T-cell populations as indicated. Upper row: RNA-seq data, Lower row: proteome data

## Supplementary Figure 6

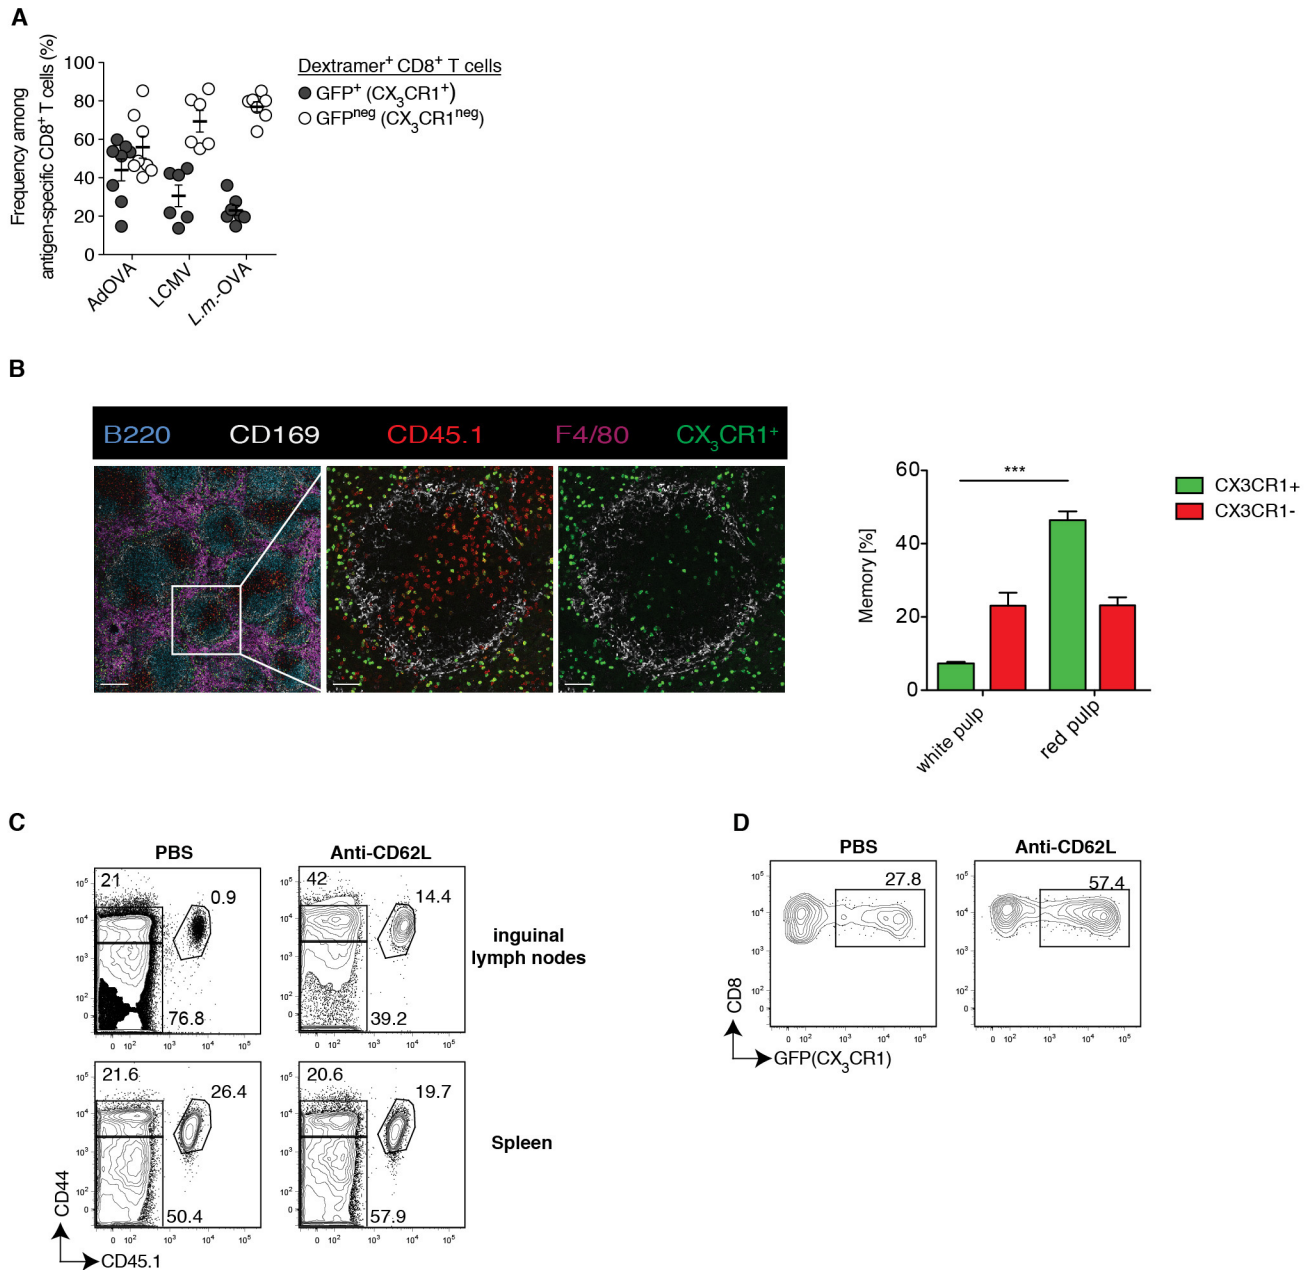

### Supplementary Figure 6 Localization of CX<sub>3</sub>CR1 expressing memory CD8<sup>+</sup> T cells to lymphoid tissue

**(A)** CX<sub>3</sub>CR1<sup>+</sup>/GFP mice were infected with AdOVA, L.m.-OVA or LCMV (WE strain). At d45-60 p.i., the frequency of GFP<sup>+</sup> (CX<sub>3</sub>CR1<sup>+</sup>) and GFP<sup>neg</sup> (CX<sub>3</sub>CR1<sup>neg</sup>) cells was determined among OVA-specific CD44<sup>+</sup> CD8<sup>+</sup> T cells (after AdOVA and L.m.-OVA infection) or gp33-specific CD44<sup>+</sup> CD8<sup>+</sup> T cells (after LCMV infection) identified by Dextramer staining in pooled lymph nodes. **(B)** Detection GFP<sup>+</sup> (CX<sub>3</sub>CR1<sup>+</sup>) CD45.1<sup>+</sup> T cells in spleen. **(C, D)** Mice harboring CD45.1<sup>+</sup> memory OT-ICX<sub>3</sub>CR1-GFP T cells were injected daily with anti-CD62L neutralizing antibody (100μg/mouse i.p.) or PBS over a period of 6 days. **(C)** Frequency of endogenous (CD45.1 negative) polyclonal naive CD44<sup>low</sup> CD8<sup>+</sup> T cells, CD44<sup>+</sup> CD8<sup>+</sup> T cells and CD45.1<sup>+</sup> memory OT-ICX<sub>3</sub>CR1-GFP T cells in inguinal lymph nodes and spleen. **(D)** Frequency of GFP<sup>+</sup> and GFP<sup>neg</sup> cells among CD45.1<sup>+</sup> memory OT-ICX<sub>3</sub>CR1-GFP T cells in inguinal lymph nodes. Data is representative for three independent experiments with 3 mice per group

## Supplementary Figure 7

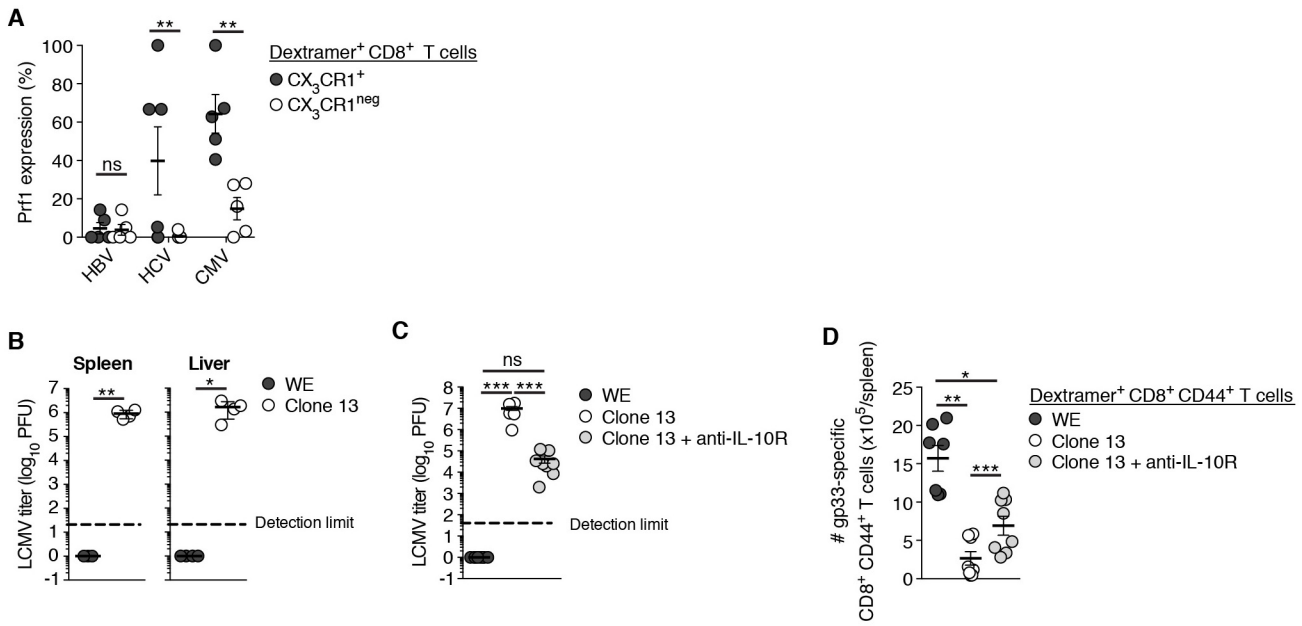

### Supplementary Figure 7. *CX<sub>3</sub>CR1* identifies cytotoxic virus-specific CD8<sup>+</sup> T cells in chronic viral infection

**(A)** Analysis of Perforin (Perf1) expression among CX<sub>3</sub>CR1<sup>+</sup> and CX<sub>3</sub>CR1<sup>neg</sup> virus-specific CD8<sup>+</sup> T cells isolated from blood of patients chronically infected with HBV or HCV (see Figure 7A, B). CMV-specific CD8<sup>+</sup> T cells from the same donors served as control. \*\**p*<0.01, t-test. **(B)** Determination of viral titers in liver and spleen of CX<sub>3</sub>CR1<sup>+/GFP</sup> mice 40 days after infection with either LCMV WE or LCMV Clone 13. \**p*<0.05, \*\**p*<0.01, t-test. **(C)** Effect of anti-IL10R treatment on viral titers of LCMV Clone 13-infected CX<sub>3</sub>CR1<sup>+/GFP</sup> mice 40 days after infection. \*\*\**p*<0.001, ANOVA. **(D)** Quantification of splenic gp33-specific CD8<sup>+</sup> T cells of CX<sub>3</sub>CR1<sup>+/GFP</sup> mice 40 days p.i. with LCMV WE, LCMV Clone 13 or after infection with LCMV Clone 13 followed by treatment with anti-IL10R antibody. Each dot represents T cells from one mouse. \**p*<0.05, \*\**p*<0.01, \*\*\**p*<0.001, ANOVA.
